# Supplementary material for: Liver-expressed antimicrobial peptide 2 elevation contributes to age-associated cognitive decline
Source: PubMed Central journal article supplement (PMC10322694; doi:10.1172/jci.insight.166175), 2023-05-22
Supplement: jciinsight-8-166175-s150.pdf [file jciinsight-8-166175-s150.pdf]

**Supplementary figures and table:**

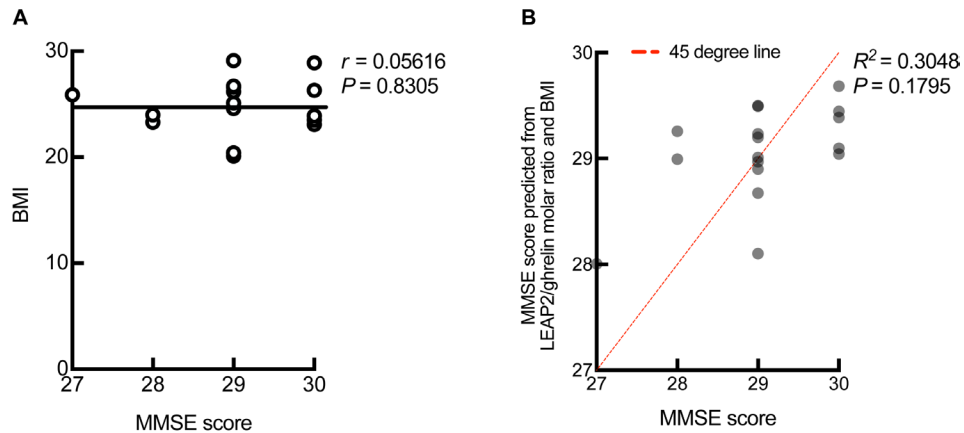

**Supplementary Figure 1. Correlation analysis of MMSE scores and BMI in the tested elderly.**

**(A)** Correlation between MMSE scores and BMI was calculated using two-tailed Pearson correlation coefficients.  $n = 19$  subjects. **(B)** Multiple linear regression of MMSE score prediction with LEAP2/ghrelin molar ratio and BMI as independent factors. Actual value (X axis) vs predicted value (Y axis).  $n = 19$  subjects.

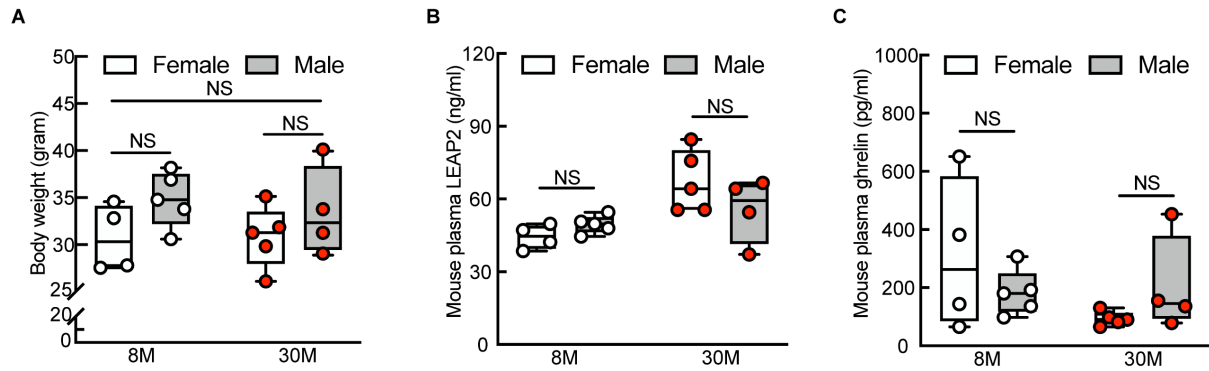

**Supplementary Figure 2. Body weight measurement and sex effect examination in middle-aged and old mice.** (A) The body weight (in grams) of 8-month-old and 30-month-old mice shows no sex difference.  $n = 4$  female (8 months old), 5 male (8 months old), 5 female (30 months old), 4 male (30 months old). Two-way ANOVA followed by Bonferroni post hoc analysis. NS = not significant. All error bars represent means  $\pm$  SEM. 8M = 8 months old mice, 30M = 30 months old mice. (B) Plasma LEAP2 or (C) plasma ghrelin shows no sex difference.  $n = 4$  female (8 months old), 5 male (8 months old), 5 female (30 months old), 4 male (30 months old). Unpaired Student's  $t$  test. NS = not significant. 8M = 8 months old mice, 30M = 30 months old mice.

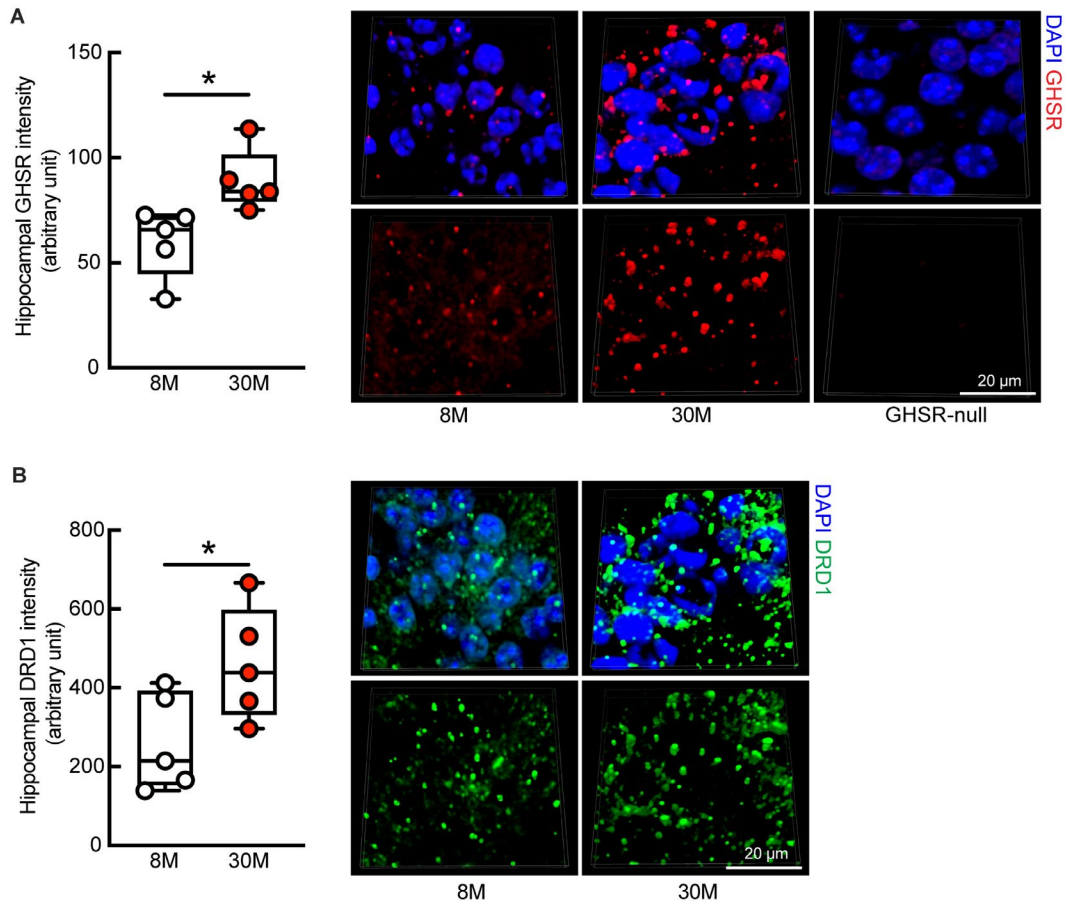

**Supplementary Figure 3. Age-related expression changes of hippocampal GHSR and DRD1.**

(A) Upregulated hippocampal GHSR and DRD1 in 30-month-old mice. Immunostaining of hippocampal GHSR (A) and DRD1 (B). Right panels are representative images. DAPI was used to label nucleus. GHSR-null mice were used as negative control for GHSR staining.  $n = 5$  mice (8M and 30M),  $n = 2$  GHSR-null mice. Unpaired Student's t test.  $*P < 0.05$ . Scale bar = 10  $\mu\text{m}$ . 8M = 8 months old mice, 30M = 30 months old mice, GHSR-null = 8 months old GHSR-null mice.

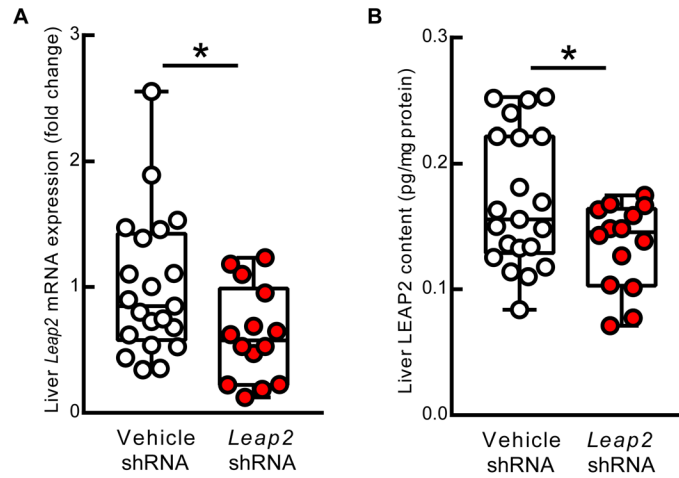

**Supplementary Figure 4. Hepatic LEAP2 downregulation in LEAP2-manipulated old mice.**

Hepatic *Leap2* mRNA expression (**A**) and LEAP2 content (**B**) in vehicle- and *Leap2* shRNA-treated mice.  $n = 21$  mice in vehicle shRNA group, 14 mice in *Leap2* shRNA group. Unpaired Student's  $t$  test.  $*P < 0.05$ .

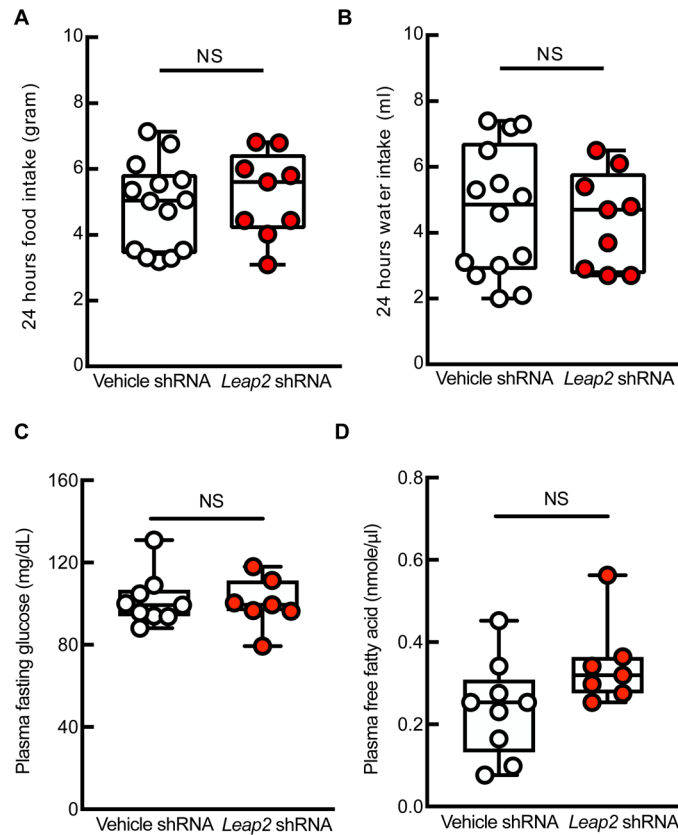

**Supplementary Figure 5. No impact of LEAP2 downregulation on metabolism in aged mice.**

(A) 24-hour food intake in vehicle- and *Leap2* shRNA-treated mice.  $n = 14$  mice in vehicle shRNA group, 9 mice in *Leap2* shRNA group. (B) 24-hour water intake in vehicle- and *Leap2* shRNA-treated mice.  $n = 14$  mice in vehicle shRNA group, 9 mice in *Leap2* shRNA group. (C) Plasma fasting glucose in vehicle- and *Leap2* shRNA-treated mice.  $n = 9$  mice in vehicle shRNA group, 7 mice in *Leap2* shRNA group. (D) Plasma free fatty acid in vehicle- and *Leap2* shRNA-treated mice.  $n = 9$  mice in vehicle shRNA group, 7 mice in *Leap2* shRNA group. Statistical analysis: Unpaired Student's  $t$  test. NS = not significant.

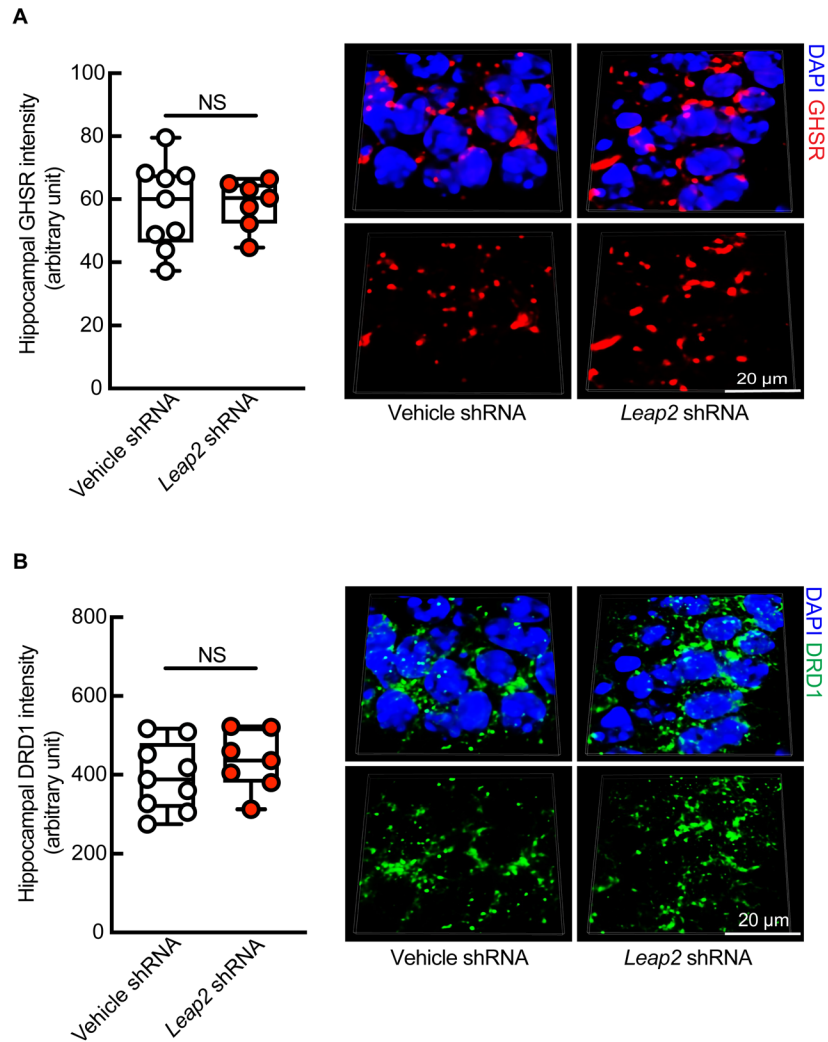

**Supplementary Figure 6. No influence of LEAP2 downregulation on hippocampal GHSR and DRD1 expression in aged mice. (A)** Hippocampal GHSR staining in vehicle and *Leap2* shRNA-treated mice.  $n = 9$  mice in vehicle shRNA group, 7 mice in *Leap2* shRNA group. Unpaired Student's t test. NS = not significant. Right panels are the representative images. Scale bar = 10 µm. **(B)** Hippocampal DRD1 staining in vehicle and *Leap2* shRNA-treated mice.  $n = 9$  mice in vehicle shRNA group, 7 mice in *Leap2* shRNA group. Unpaired Student's t test. NS = not significant. Right panels are the representative images. Scale bar = 10 µm.

**sTable 1. Demographic characteristics of human subjects.**

| Characteristics   | Value $\pm$ SD     |
|-------------------|--------------------|
| Age (years)       | 71.68 $\pm$ 7.432  |
| Sex (male/female) | 7/12               |
| Race              |                    |
| White             | 64%                |
| African American  | 36%                |
| Education (years) | 16.43 $\pm$ 1.989  |
| Height (inches)   | 65.66 $\pm$ 3.368  |
| Weight (lbs)      | 153.1 $\pm$ 23.56  |
| BMI               | 24.87 $\pm$ 2.725  |
| MMSE score        | 29.06 $\pm$ 0.8269 |

**sTable 1.** Demographic information of the cohort including age, sex, race, education, height, weight, BMI, and MMSE score are evaluated.  $n = 19$  subjects.
